# Supplementary material for: A comprehensive CRISPR/Cas9-targeted base mutagenesis identifies an amino acid substitution separating functions of SPEN in X chromosome inactivation from development
Source: Research Square preprint supplement (doi:10.21203/rs.3.rs-6717927/v1), 2025-06-06
Supplement: Supplementary file 1 [file 20ed13b343c06a835bdbd7fd.xlsx]

## Sheet: SupplTable2_PCRprimers
Hprt screen
Primer name	Sequence (5'-3')	Amplicon length
AS-HPRT-for1	CTTCCTCCTCAGACCGCTTTT	1110 bp
AS-HPRT-rev1	AATCGAGAGCTTCAGACTCGT
Msh2 screen
Primer name	Sequence (5'-3')	Amplicon length
MSH2_FW1	CTGGGACCTTGCTCGCTTAT	1598 bp
MSH2_RV1	GGAACTCGTGGTTTTCCACC
MSH2_FW2	TATTAACCAGCTCCCCAGCG	1499 bp
MSH2_RV2	GTTCCAGTGGGGAGCACTAC
Spen screen
Primer name	Sequence (5'-3')	Amplicon length
SPEN-AS-for1	GAGAGGGATGGTCTCTGCAC	2185 bp
SPEN-AS-rev1	TGGAGTCCTCAGGGTAGGTG
SPEN-AS-for2	GAGACCAAGGGCAGGAAAAT	2153 bp
SPEN-AS-rev2	TCATCATCGTCATGGAAGGA
SPEN-AS-for3	AGAAGCGAAGGACGGATCAC	2247 bp
SPEN-AS-rev3	CAGGCTCTTTCCTCTCATGC
SPEN-AS-for4	CCTAGCTTGCCTCTCAGCAG	2092 bp
SPEN-AS-rev4	GAGCCACCTTCTCTTTGTCG
SPEN-AS-for5	TGTCTGCCACAGGAGTTACG	2197 bp
SPEN-AS-rev5	TCACCACTGGAGTGCACAAT
SPEN-AS-for6	TGGTGAAGGAAGCGGTTAAG	1300 bp
SPOC-rev	AGGGCATTTTCCTGAGGCTC
