# Supplementary material for: A comprehensive CRISPR/Cas9-targeted base mutagenesis identifies an amino acid substitution separating functions of SPEN in X chromosome inactivation from development
Source: Research Square preprint supplement (doi:10.21203/rs.3.rs-6717927/v1), 2025-06-06
Supplement: Supplementary file 2 [file 925e8b7724636979b6c6af68.xlsx]

## Sheet: SupplTable3_Reagents
Product	Manufacturer	Prod. Nr.
β-mercaptoethanol (≥99.0%)	Sigma-Aldrich	M6250-250ML
4% Paraformaldehyde (PFA) in PBS	Santa Cruz Biotechnology	Sc281692
6-Thioguanine (6TG)	Sigma-Aldrich	A4660-2.5 (CAS: 205-8272)
AffiniPure Alexa Fluor 488 Anti-Rabbit (Donkey, secondary)	Jackson ImmunoResearch	711-545-152
Alt-R Cas9 Electroporation enhancer (10 nmol)	Integrated DNA Technology (IDT)	1075916
Alt-R HDR Enhancer V2	Integrated DNA Technology (IDT)	10007910
BsteII-HF	New England Biolabs (NEB)	R3162
CHIR99021	Axon Medchem	252917-06-9
CUT&RUN Assay Kit	Cell SignalingTechnology	86652
CUT&RUN H3K27ac ab	Cell Signaling Technology	8173
DMEM, high glucose (Gibco)	Thermo Fisher Scientific	41965039
Doxycycline hyclate, ≥ 98% (HPLC)	Sigma-Aldrich	D9891-1G
EZH2 (D2C9) XP Rabbit mAb	Cell Signaling Technology	5246
Fetal Bovine Serum	biowest	S1810-500 (Lot: S16927S1810)
Geltrex™ LDEV-Free, hESC-Qualified,	Thermo Fisher Scientific	A1413302
Histone H3K27me3 antibody (pAb)	Active Motif	39155
Hoechst 33342, trihydrochloride trihydrate, 10 mg/mL	Thermo Fisher Scientific	H3570
Hybrisol VII	MP Biomedicals	RIST1390
Illumina Stranded mRNA Prep, Ligation	Illumina	20040532/4
Lipofectamine 3000 Transfection Reagent (Invitrogen)	Thermo Fisher Scientific	L3000008
MEM NEAA (Gibco)	Thermo Fisher Scientific	11140-035
NDiff 227	Takara Bio	Y40002
NEBNext Ultra II DNA Library Prep Kit for Illumina	New England Biolabs (NEB)	E7103
Nextera XT DNA Library Prep Kit	Illumina	FC-131-1024
NheI-HF	New England Biolabs (NEB)	R3131
NotI-HF	New England Biolabs (NEB)	R3189
PBS, pH 7.4 (Gibco)	Thermo Fisher Scientific	10010015
PD0325901	Axon Medchem	391210-10-9
Puromycin	Sigma-Aldrich	P8833-25MG
QIAquick Gel Extraction Kit	QIAGEN	28704
Sodium pyruvate (Gibco)	Thermo Fisher Scientific	11360-039
T4 DNA Ligase	Thermo Fisher Scientific	EL0011
Triton X-100 (BioChemica)	ITW Reagents Division	A1388
TWEEN 20	Sigma-Aldrich	P1379-1L
VECTASHIELD Antifade Mounting Medium (with DAPI)	Vector Laboratories, Inc.	H-1200
XmaI	New England Biolabs (NEB)	R0180
