# Supplementary material for: A comprehensive CRISPR/Cas9-targeted base mutagenesis identifies an amino acid substitution separating functions of SPEN in X chromosome inactivation from development
Source: Research Square preprint supplement (doi:10.21203/rs.3.rs-6717927/v1), 2025-06-06
Supplement: Supplementary file 3 [file bce3e8cafac445faddf09837.xlsx]

## Sheet: SupplTable1_gRNAsequences
Hprt screen
Name	Spacer sequence	PAM	Exon	Direction	PAM pos. (ChrX) (ENSMUSG00000025630)
sgH01	GTGCTTTAATGTAATCCAGC	AGG	3	rev	52091062
sgH02	ACTTGCTCGAGATGTCATGA	AGG	3	fw	52090975
sgH03	GATGGGAGGCCATCACATTG	TGG	3	fw	52091019
sgH04	TAAGTTCTTTGCTGACCTGC	TGG	3	fw	52091067
sgH05	AGCCCCCCTTGAGCACACAG	AGG	3	rev	52091023
sgH06	AGCCATTGCTGAGGCGGCGA	GGG	1 (intron upstream)	fw	52076999
sgH07	GGTCGGCTCGCGGCAAAAAG	CGG	1	rev	52077070
sgH08	CAGATTAGCGATGATGAACC	AGG	2	fw	52087986
sgH09	CTCATGGACTGATTATGGAC	AGG	2	fw	52088074
sgH10	ACTTGCTCGAGATGTCATGA	AGG	3	fw	52090995
sgH11	GATGGGAGGCCATCACATTG	TGG	3	fw	52091019
sgH12	GTGCTTTAATGTAATCCAGC	AGG	3	rev	52091062
sgH13	CTGATAAAATCTACAGTCAT	AGG	3	rev	52091111
sgH14	CTAGAATGATCAGTCAACGG	GGG	4	fw	52097547
sgH15	GATGATCTCTCAACTTTAAC	TGG	4	fw	52097590
sgH16	ACTTTCTAACTTAGTGTGTA	TGG	5 (intron downstream)	fw	52101228
sgH17	TAAAAGGATATAATTGACAC	TGG	6	fw	52105239
sgH18	TGGGGCTGTACTGCTTAACC	AGG	6	rev	52105266
sgH19	GTACAGCCCCAAAATGGTTA	AGG	6	fw	52105298
sgH20	CCTGTATCCAACACTTCGAG	AAG	7	rev	52109000
sgH21	AAGGGCATCTACTTACAGTC	TGG	7	rev	52109023
sgH22	TATCCAACAACAAACTTGTC	TGG	8	rev	52109218
sgH23	GAAGTACTCATTATAGTCAA	GGG	8	rev	52109243
sgH24	GTTTGTGTCATTAGTGAAAC	TGG	9	fw	52109968
sgH25	AAGTTGAATCTGCAAATACG	AGG	9	fw	52110022
sgH26	ATGTTGCCAGTAAAATTAGC	AGG	9	fw	52110055
sgH27	TTCATGCAAAAAGCTTTACT	AGG	9	rev	52110082
sgH28	AAAACAGTAACATTCATAGA	AGG	9	rev	52110104
Msh2 screen
Name	Spacer sequence	PAM	Exon	Direction	PAM pos. (Chr17) (ENSMUSG00000024151)
sgMsh2_01	GCCTGCAAGGCTGCAGAAGT	CGG	1 (5' UTR)	fw	87979789
sgMsh2_02	TCCTAGAGTTCGCGGGAAGC	TGG	1 (5' UTR)	fw	87979833
sgMsh2_03	CGGTAGACTCCCACCCACCG	GGG	1 (5' UTR)	fw	87979884
sgMsh2_04	AGAGGCCGGACGAGGTTTAG	GGG	1 (5' UTR)	fw	87979939
sgMsh2_05	GAAACGACGCGGCCAGCGCA	GGG	1 (5' UTR)	fw	87979980
sgMsh2_06	GTGGAGCGGCTCGGAAATGG	CGG	1	fw	87980029
sgMsh2_07	GGCTTCGTGCGCTTCTTTGA	GGG	1	fw	87980096
sgMsh2_08	GCGCCGTGTAAAAGTCGCCG	CGG	1	rev	87980138
sgMsh2_09	CTGGGTCTTGAACACCTCGC	GGG	1	rev	87980185
sgMsh2_10	CGTGATCAAGTACATGGGGC	CGG	1	fw	87980230
sgMsh2_11	GCTAAGCACAACACTCTGCA	GGG	2	rev	87985646
sgMsh2_12	TATAAACTTCAACTCGATAC	TGG	2	rev	87985713
sgMsh2_13	AGCTGGAAATAAGGCGTCTA	AGG	2	fw	87985763
sgMsh2_14	ACATGTCATTGTTACCAAAC	AGG	3	rev	87987264
sgMsh2_15	TATGGGTATTAAAATGGCCG	TGG	3	fw	87987323
sgMsh2_16	TGGAGAACTGATCATTCTCG	GGG	3	rev	87987396
sgMsh2_17	TCTGATTCAGATTGGACCAA	AGG	3	fw	87987452
sgMsh2_18	GGAGAGACTACTGGAGACAT	GGG	3	fw	87987492
sgMsh2_19	TATAAACAGGTTATCCAGAG	AGG	4	fw	87989971
sgMsh2_20	GATCTCAACCGGTTACTGAA	AGG	4	fw	87990052
sgMsh2_21	TAGTGCTGCCCTACCAGAGA	TGG	4	fw	87990096
sgMsh2_22	TTATCAGACGATTCAAATTT	TGG	5	fw	87992931
sgMsh2_23	CCATGTCCAACTTCATGTAC	TGG	5	rev	87992964
sgMsh2_24	CCAGGTAAAAGAGACAACAT	GGG	5 (intron downstream)	fw	87993032
sgMsh2_25	GGTTCTGTTGAAGACACCAC	TGG	6	fw	87993745
sgMsh2_26	GACAAAGATTGGTTAACCAG	TGG	6	fw	87993815
sgMsh2_27	AGCCGCTCATGGATAGGAAC	AGG	6	fw	87993845
sgMsh2_28	TTGTCGAGGATTCAGAACTG	AGG	7	fw	87996411
sgMsh2_29	ATTTCTTGGCAAGCCGGTTA	AGG	7	rev	87996452
sgMsh2_30	AGACTGTTACCGACTGTATC	AGG	7	fw	87996520
sgMsh2_31	CAGGCTCTGGAGAAATACGA	AGG	7	fw	87996569
sgMsh2_32	TCAGAACGAAGATCAATAAG	AGG	8	rev	88003962
sgMsh2_33	AACAACTTTAGATATGGATC	AGG	8	fw	88004032
sgMsh2_34	CTCAGGTTAGGATCAAATGA	AGG	9	rev	88014638
sgMsh2_35	CCGGGCTGCATTTATTAAGG	TGG	9	fw	88014728
sgMsh2_36	GCCCGGGGGCTCGGTAAGAT	GGG	9 (intron downstream)	fw	88014742
sgMsh2_37	AATCGTAAAGGATTGGATCC	TGG	10	fw	88015891
sgMsh2_38	TTATTTCCGTGTAACCTGCA	AGG	10	fw	88015953
sgMsh2_39	ATGGCGTGAAGTTTACCAAC	AGG	10	fw	88016030
sgMsh2_40	GAACAAAGGCGAGTATGAAG	AGG	11	fw	88020111
sgMsh2_41	GAAATTGTCAATATTTCCTC	AGG	11	fw	88020154
sgMsh2_42	ACATCGTTGAGCGTCTGCAT	TGG	12	rev	88024895
sgMsh2_43	ACTGGTCGTACATAAGGAAC	GGG	12	rev	88024970
sgMsh2_44	GAATTATATTGAAAGCCTCC	AGG	12	fw	88025036
sgMsh2_45	CAGATGTTCCACATCATTAC	TGG	12	fw	88025128
sgMsh2_46	TCAACATACATTCGTCAGAC	CGG	13	fw	88026070
sgMsh2_47	GACACTTCTGCCGACTCACA	GGG	13	rev	88026110
sgMsh2_48	TTGCATCCTTGCTCGAGTCG	GGG	13	fw	88026162
sgMsh2_49	CACATTCATGGCTGAAATGC	TGG	13	fw	88026213
sgMsh2_50	CTTAATAATCATTGATGAGC	TGG	14	fw	88026755
sgMsh2_51	GATTACATTGCAACGAAGAT	TGG	14	fw	88026828
sgMsh2_52	ATTAACAGTTGGTATTTGGT	TGG	14	rev	88026878
sgMsh2_53	CACTTGGTAAAGCATAGTTA	GGG	14	rev	88026935
sgMsh2_54	TCAGAGTTTCGGGATTCACG	TGG	15	fw	88028342
sgMsh2_55	GATAGCGTGCGCCAAGCAGA	AGG	15	fw	88028393
sgMsh2_56	CAGAACATTGGAACCTCGCT	GGG	15	fw	88028436
sgMsh2_57	CGGTCAGCAGGGCATTCGTC	AGG	15 (intron downstream)	fw	88028510
sgMsh2_58	GCACCTGCTTGACCTTCGAC	AGG	16	rev	88030786
sgMsh2_59	GCCCTTTACTGCCATGTCGG	AGG	16	fw	88030827
sgMsh2_60	CGAGATCATTTCACGGATAA	AGG	16	fw	88030917
sgMsh2_61	GACAGTGGGTGGGCGTGCAC	GGG	16 (3' UTR)	fw	88030957
sgMsh2_62	TAGTGCTCCCCACTGGAACC	TGG	16 (3' UTR)	fw	88031011
sgMsh2_63	AAACATTACCGTCTGTAGCT	GGG	16 (3' UTR)	fw	88031069
sgMsh2_64	ATCATGTAGTTTGTACATTG	GGG	16 (3' UTR)	fw	88031148
Spen screen
Name	Spacer sequence	PAM	Exon	Direction	PAM pos. (Chr4) (ENSMUSG00000040761)
sgSp001	AAACTTACCGGAGAACGTGC	GGG	1	fw	141265654
sgSp002	GTCAAGATTCTCCCCAAGCG	GGG	2	fw	141249423
sgSp003	CACAACTCCGTCAACAAAAT	GGG	2	fw	141249507
sgSp004	CTCTCTACTACGAGACGCTA	TGG	2	rev	141249587
sgSp005	CCATCACTTCATGCACGAGA	AGG	2	fw	141249678
sgSp006	CCCCCGTTCATGGTGTCCAT	AGG	3	rev	141244186
sgSp007	GTTGTAAAGTCCGCTCTCGA	GGG	3	rev	141244259
sgSp008	CGGGCCCTAGGTTCGTATCG	GGG	3	rev	141244338
sgSp009	GACATTACCCGGGAGGTACG	AGG	3	fw	141244430
sgSp010	CTAGAAACCAGTCCCCGCAG	AGG	3	fw	141244512
sgSp011	GCTGCTGATGGAGTCACTAC	TGG	3	rev	141244579
sgSp012	GCGGGCCGGAGAGTCGTCAC	TGG	4	rev	141221595
sgSp013	CCCTTGAAAAAGATGAGCCC	CGG	4	fw	141221687
sgSp014	GTAGACACAAGCCTTAAAGA	CGG	5	fw	141220749
sgSp015	CTTGCTGCCGGAAGAACACC	AGG	5	rev	141220827
sgSp016	AAAGCATTGACCGCATCCAA	GGG	5	fw	141220881
sgSp017	TGAAAATGAGTTTCGGCCCT	TGG	6	fw	141217213
sgSp018	AGCGCTGAAAGATGTTTCGA	AGG	6	rev	141217298
sgSp019	TACTGCAGGAACGCGTACTG	AGG	7	rev	141215360
sgSp020	CCTTGGAAATAACCGCCTCA	AGG	7	fw	141215454
sgSp021	GCATGCCTACCAACTGTGTG	TGG	8	fw	141214939
sgSp022	CCTTTACCACAGGTCCGTAT	CGG	8	rev	141214995
sgSp023	GTGGTGTTTGACCGCTTGAA	AGG	9	fw	141212916
sgSp024	GGATGCACAGGCGGCTGTCA	AGG	9	fw	141212969
sgSp025	TGCAAATCGGGAAAGCCAAC	TGG	10	fw	141211090
sgSp026	TATCACTGCATGGAGAAATC	TGG	10	fw	141211118
sgSp027	CTCAGTCCAAGCATGAAGAC	TGG	11	fw	141208117
sgSp028	CCTATGAGTACAGTCAAGAA	CGG	12	fw	141198744
sgSp029	AGGAGGGACTATCCGGCTCG	GGG	12	fw	141198815
sgSp030	CTATATTCTCTGTATTCGCG	AGG	12	rev	141198885
sgSp031	ATATTCGGGAGTACAGCTAT	AGG	12	fw	141198948
sgSp032	CTGTGGACGACGCAAGTGCA	CGG	12	rev	141199033
sgSp033	CTGAGAGGAGGCTGTACCGC	CGG	12	fw	141199122
sgSp034	GCGCTACACAAAAAACGAAA	AGG	12	fw	141199219
sgSp035	ACGAATAGTTCGCAAGGAGA	AGG	12	fw	141199288
sgSp036	TCAGCCTTCGGAAACCGAGC	AGG	12	fw	141199369
sgSp037	AGGGCCAGCCAAGAACCGCC	TGG	12	fw	141199465
sgSp038	CCGATGCCTTGGTAGTGTCA	CGG	12	rev	141199562
sgSp039	CGGCCCGAGGGAAAGCGCTG	AGG	12	fw	141199656
sgSp040	GCTGAGCTCGGGCGTCTGCT	CGG	12	rev	141199732
sgSp041	AAAAGGCGCTTTGCAGATTC	TGG	12	fw	141199805
sgSp042	AGTATCCTCTGTCTCGGGGC	TGG	12	rev	141199846
sgSp043	CAGCCTGACACATCAAGAGA	TGG	12	fw	141199907
sgSp044	GGAATCAAAAAAAACTAAGC	TGG	12	fw	141199990
sgSp045	CCCAGCTCAGACGTACACGC	AGG	12	fw	141200087
sgSp046	AGCTGCAGCTGTTTGGGCTG	AGG	12	rev	141200160
sgSp047	CCGGCCTCGTGAGGAACCAG	CGG	12	fw	141200251
sgSp048	CGCAGAGCTACCGGAACAGA	TGG	12	fw	141200346
sgSp049	AAGATGTAGATGACTACGAA	AGG	12	fw	141200438
sgSp050	GAAGCGAAGGACGGATCACG	TGG	12	fw	141200526
sgSp051	TGCTCTCCGAGTGTCCGCCA	CGG	12	fw	141200625
sgSp052	TCACTGCTGCGTTAGGATAG	GGG	12	rev	141200712
sgSp053	TCTCTCTTGCCAGAATCGTA	AGG	12	rev	141198704
sgSp054	ATCGGAGGGTCCCACCGGCT	TGG	12	rev	141198782
sgSp055	AGAGAGACAGTCTACGAAAG	AGG	12	fw	141198875
sgSp056	CCGAGGGCTGTCATAGAAGC	TGG	12	rev	141198960
sgSp057	GACTCGCTAGCTCTTTAGAA	AGG	12	fw	141199055
sgSp058	TTTCTTCACGGGATGATGAG	AGG	12	rev	141199132
sgSp059	CCAGGACGGAATAGGCCTGG	GGG	12	rev	141199230
sgSp060	CTGATAAAAAGGACGAGCGC	AGG	12	fw	141199319
sgSp061	AGAGGCTGCAGCACCTTGAG	AGG	12	fw	141199415
sgSp062	TGATTCGGTGCAGGAGCCAG	TGG	12	fw	141199512
sgSp063	GAAGGACCAGAAGCCCAAAG	AGG	12	fw	141199590
sgSp064	CCGAAAGCCCCTGTTTCAGC	TGG	12	fw	141199684
sgSp065	GCGGAGGCTCCTTCACCAGC	AGG	12	fw	141199780
sgSp066	CTGTACCCGTGGAGCAGCCC	AGG	12	fw	141199865
sgSp067	TTCAGCATTCACACAAGGGA	CGG	12	rev	141199962
sgSp068	GGGCTGGGGACTGCTAGGTT	TGG	12	rev	141200034
sgSp069	GTGGCGTCAGGCTCAGTGCT	TGG	12	rev	141200123
sgSp070	TTCTACATCTTCAGAAGCGG	GGG	12	rev	141200178
sgSp071	AGGCTTCTCCACGACGCTGG	CGG	12	rev	141200277
sgSp072	AAGAGGTCCAGCTCTCCTCG	TGG	12	fw	141200359
sgSp073	TGAGAGGCAAGCTAGGCTCA	GGG	12	rev	141200449
sgSp074	CGACCACGAGAGCCGGTCCC	CGG	12	fw	141200538
sgSp075	CCACCACCCCTCGGAGGGGA	AGG	12	fw	141200636
sgSp076	CAGCTGCTGCTGGACCCCAA	GGG	12	fw	141200771
sgSp077	GAAGGTAACCCTAAGTCCAG	AGG	12	fw	141198727
sgSp078	CACCTTCCCAGTTGAGGTCC	TGG	12	fw	141198819
sgSp079	TTCCAGGCTTCTCTGATGCG	CGG	12	rev	141198897
sgSp080	AGGAGCCACTTCCCTTCTGG	GGG	12	rev	141198997
sgSp081	GGAAAGTGCGTCTGCCTCCA	CGG	12	fw	141199089
sgSp082	CGTGGCCGTGCCCTTGCTAG	CGG	12	rev	141199182
sgSp083	CCAGGCCAGCGAAACTGAAC	TGG	12	fw	141199278
sgSp084	CTGAGATCCTGGGGGAACGG	AGG	12	rev	141199344
sgSp085	AGTCGGGAATCTTGGAGACA	GGG	12	fw	141199430
sgSp086	AGAGTCACCACTGTTTCCTC	TGG	12	rev	141199506
sgSp087	ACTCCTCCCCGGAAAGACAA	AGG	12	fw	141199582
sgSp088	CACAGAGACTCGTGCCTCTG	AGG	12	fw	141199662
sgSp089	CGAAGGTGCACTCCGCAGGA	GGG	12	rev	141199762
sgSp090	GGGAGCACAGGGGCTTTGCA	CGG	12	rev	141199847
sgSp091	GATCGAGTGCACCTTGAACC	TGG	12	rev	141199920
sgSp092	TGGAGGTGGGAGCTTTGCTA	TGG	12	rev	141200010
sgSp093	GATGGGGTGGACTGAGCCCG	AGG	12	rev	141200105
sgSp094	TACACTGAGGAAGATCCTCA	TGG	12	fw	141200199
sgSp095	GAGTGCGCCTTGTCTGCAGG	AGG	12	fw	141200289
sgSp096	TTCTCTTTGTCGGCAGCCAC	CGG	12	rev	141200384
sgSp097	GATGCCCGTTAGCATTGACC	TGG	12	fw	141200472
sgSp098	GGGCCCTTTAAGGCATTCAC	CGG	12	rev	141200570
sgSp099	GGCCCCGTGAGGACATTCAC	GGG	12	rev	141200666
sgSp100	TGTTGTGGCCGTCACGCCAC	AGG	12	rev	141200763
sgSp101	GCGGCTGTTCTCATTGCTAC	TGG	12	rev	141198711
sgSp102	GCAGACACGGGCTCTGGCGC	GGG	12	fw	141198793
sgSp103	TGTCCATTGCGCTGGCTGGA	GGG	12	rev	141198892
sgSp104	CCGACCCAGTCTGCACCCAA	AGG	12	fw	141198988
sgSp105	TGGCCGGTCCGTCTTCACGG	AGG	12	rev	141199080
sgSp106	GACCCAGGGTGGCACAGTGA	AGG	12	fw	141199170
sgSp107	GTCAGCAAGCTTCTTGTTGG	TGG	12	rev	141199245
sgSp108	TCCTTCAGCCAGCTAACCTG	GGG	12	fw	141199316
sgSp109	GGGGGTTGCCAAGTGGGCGA	TGG	12	rev	141199416
sgSp110	CGCTGTGGAGGTCGTGCTGC	TGG	12	rev	141199506
sgSp111	GGCATGATGACAGACTGCTC	TGG	12	rev	141199598
sgSp112	CCGGATGCTGTAGGTGATGC	TGG	12	rev	141199698
sgSp113	GGTTCATTATCACCTCCCTG	TGG	12	fw	141199878
sgSp114	TCCCCGGGACGTGCGGATCA	TGG	12	fw	141199974
sgSp115	CGCTTCCTTCACCAGTTGCT	GGG	12	rev	141200058
sgSp116	CGGGCTTCACCATGAGGGGG	CGG	12	rev	141200156
sgSp117	ACCTGTGGTCGTAACCCACG	GGG	12	fw	141200250
sgSp118	CTGCTGAGCGGGGGCGTGGT	AGG	12	rev	141200313
sgSp119	GAAAGCTGGCTTCCTCACCT	GGG	12	rev	141200400
sgSp120	AGGCTGCGTGGCCTGCGTAG	AGG	13	rev	141197499
sgSp121	ACCGAGTGGCAAGATTCCTC	AGG	13	fw	141197595
sgSp122	GCCCTCTGAAGCTGAGCGTG	TGG	13	rev	141197681
sgSp123	CTGCTTTGGGGCAGCCTGAG	AGG	13	rev	141197781
sgSp124	GAAGACTCTTGTTTGGGAGC	TGG	13	rev	141197876
sgSp125	CGGGACACCACAACGGCCTG	TGG	13	fw	141197925
sgSp126	GCAGGCCCTGCCACACGATG	GGG	14	rev	141197158
sgSp127	CGTCTCTGGCAACAATGTCC	TGG	14	fw	141197241
sgSp128	CGCCCAGAGGATGCGACTAG	AGG	14	fw	141197310
sgSp129	TCCTCCTGGTCACGGCCACA	GGG	15	rev	141196753
sgSp130	TGCCTTCATCACTTACCTGC	AGG	15	fw	141196826
sgSp131	GTGACTCTCGGAGAACTCAC	AGG	16	rev	141195255
sgSp132	CCGAGGCAATGACAATCATG	AGG	16	rev	141195331
Engineering of W522C
	Sequence	PAM	Cut to mutation distance	Direction	Position
sgRNA	CCAACTGTGTGTGGTTAGAT	GGG	0	rev	141487635
	Sequence
plus donor	AATGCCGAGTTAAATACTGATCGGACACATTTGAAGAAAGGCCATCTAAGCACACACAGTTGGTAGGCATGCTCTTTCCAAAACCCAGCTGA			fw
minus donor	TCAGCTGGGTTTTGGAAAGAGCATGCCTACCAACTGTGTGTGCTTAGATGGCCTTTCTTCAAATGTGTCCGATCAGTATTTAACTCGGCATT			rev
